# Supplementary material for: Third Generation Antivenomics: Pushing the Limits of the In Vitro Preclinical Assessment of Antivenoms
Source: PubMed Central journal article supplement (PMC5450706; doi:10.3390/toxins9050158), 2017-05-10
Supplement: toxins-09-00158-s001.pdf [file toxins-09-00158-s001.pdf]

## Supplementary Materials: Third Generation Antivenomics: Pushing the Limits of the in Vitro Preclinical Assessment of Antivenoms

Davinia Pla, Yania Rodríguez and Juan J. Calvete

Table S1. Total and concentration-dependent immunoretained (RET) *B. arietans* (Ghana) venom proteins by EchiTAB-Plus-ICP® antivenom affinity column.

| RP-HPLC fraction |         | <i>Bitis arietans</i> (Ghana) total venom proteins (g) |            |             |              |             |              |             |             | Toxin class      |          |
|------------------|---------|--------------------------------------------------------|------------|-------------|--------------|-------------|--------------|-------------|-------------|------------------|----------|
|                  |         | 100                                                    | 200        | 300         | 500          | 700         | 900          | 1200        | 1500        |                  |          |
| 2                | g TOTAL | 2,1                                                    | 4,2        | 6,3         | 10,4         | 14,6        | 18,8         | 25,0        | 31,3        | DISI             |          |
|                  | g RET   | 0,6                                                    | 0,1        | 0,4         | 2,2          | 2,4         | 2,7 (14,3%)  | 1,8         | 1,9         |                  |          |
| 3                | g TOTAL | 9,6                                                    | 19,3       | 28,9        | 48,2         | 67,5        | 86,8         | 115,7       | 144,6       |                  |          |
|                  | g RET   | 6,3                                                    | 5,3        | 6,3         | 3,0          | 5,7         | 10,9 (12,6%) | 6,3         | 5,8         |                  |          |
| 4                | g TOTAL | 2,9                                                    | 5,7        | 8,6         | 14,3         | 20,0        | 25,7         | 34,3        | 42,9        |                  |          |
|                  | g RET   | 2,0                                                    | 2,4        | 2,9         | 2,3          | 3,2         | 6,1 (23,7%)  | 4,3         | 1,8         |                  |          |
| <b>Σ</b>         |         | <b>8,9</b>                                             | <b>7,8</b> | <b>9,6</b>  | <b>7,5</b>   | <b>11,3</b> | <b>19,7</b>  | <b>12,4</b> | <b>9,5</b>  |                  |          |
| 8                | g TOTAL | 3,4                                                    | 6,8        | 10,2        | 16,9         | 23,7        | 30,5         | 40,6        | 50,8        |                  | KUN      |
|                  | g RET   | 1,1                                                    | 1,5        | 2,4         | 1,4          | 3,4         | 4,1 (13,5)   | 2,7         | 1,8         |                  |          |
| <b>Σ</b>         |         | <b>1,1</b>                                             | <b>1,5</b> | <b>2,4</b>  | <b>1,4</b>   | <b>3,4</b>  | <b>4,1</b>   | <b>2,7</b>  | <b>1,8</b>  |                  |          |
| 10               | g TOTAL | 0,5                                                    | 1,0        | 1,5         | 2,5          | 3,5         | 4,5          | 6,0         | 7,5         | PLA <sub>2</sub> |          |
|                  | g RET   | 0,5                                                    | 0,8        | 1,0         | 1,4          | 2,2         | 2,9 (66,6%)  | 2,5         | 3,4         |                  |          |
| 13               | g TOTAL | 3,5                                                    | 7,0        | 10,6        | 17,6         | 24,7        | 31,7         | 42,3        | 52,9        |                  |          |
|                  | g RET   | 3,5                                                    | 6,5        | 10,3        | 14,6         | 15,7        | 17,5 (55%)   | 16,4        | 17,5        |                  |          |
| <b>Σ</b>         |         | <b>3,5</b>                                             | <b>6,5</b> | <b>10,3</b> | <b>14,6</b>  | <b>15,7</b> | <b>17,5</b>  | <b>16,4</b> | <b>17,5</b> |                  |          |
| 14               | g TOTAL | 2,8                                                    | 5,6        | 8,3         | 13,9         | 19,5        | 25,0         | 33,4        | 41,7        |                  | Cystatin |
|                  | g RET   | 2,8                                                    | 5,6        | 8,3         | 12,1         | 12,9        | 13,3 (53%)   | 10,1        | 11,5        |                  |          |
| <b>Σ</b>         |         | <b>2,8</b>                                             | <b>5,6</b> | <b>8,3</b>  | <b>12,1</b>  | <b>12,9</b> | <b>13,3</b>  | <b>10,1</b> | <b>11,5</b> |                  |          |
| 15               | g TOTAL | 12,3                                                   | 24,6       | 36,9        | 61,5         | 86,1        | 110,7        | 147,6       | 184,6       | SerPro           |          |
|                  | g RET   | 11,5                                                   | 23,6       | 34,5        | 39,6 (64,4%) | 38,7        | 38,6         | 37,5        | 11,9        |                  |          |

|          |         |             |             |              |             |              |              |              |             |           |
|----------|---------|-------------|-------------|--------------|-------------|--------------|--------------|--------------|-------------|-----------|
| 16       | g TOTAL | 2,0         | 4,0         | 6,0          | 10,0        | 14,1         | 18,1         | 24,1         | 30,1        | CTL       |
|          | g RET   | 2,0         | 4,0         | 6,0          | 9,0         | 9,4          | 10,0 (55.2%) | 9,6          | 7,5         |           |
| 18       | g TOTAL | 6,0         | 11,9        | 17,9         | 29,8        | 41,7         | 53,6         | 71,4         | 89,3        |           |
|          | g RET   | 6,0         | 11,9        | 17,9         | 25,9        | 29,5         | 31,2 (59%)   | 29,0         | 20,4        |           |
| <b>Σ</b> |         | <b>19,5</b> | <b>39,5</b> | <b>58,4</b>  | <b>74,5</b> | <b>77,6</b>  | <b>79,8</b>  | <b>76,1</b>  | <b>39,8</b> |           |
| 20       | g TOTAL | 4,3         | 8,7         | 13,0         | 21,7        | 30,4         | 39,1         | 52,2         | 65,2        |           |
|          | g RET   | 4,3         | 8,5         | 12,9         | 20,3        | 27,8         | 32,0         | 34,6 (66.3)  | 31,0        |           |
| 22       | g TOTAL | 13,5        | 27,0        | 40,5         | 67,5        | 94,5         | 121,5        | 161,9        | 202,4       |           |
|          | g RET   | 13,4        | 26,9        | 40,1         | 61,3        | 64,3         | 70,6 (58.1%) | 66,3         | 43,8        |           |
| 25       | g TOTAL | 1,4         | 2,8         | 4,2          | 7,0         | 9,8          | 12,6         | 16,8         | 21,0        |           |
|          | g RET   | 1,4         | 2,8         | 4,0          | 6,2         | 8,6          | 10,7         | 13,1 (78%)   | 13,0        |           |
| <b>Σ</b> |         | <b>19,1</b> | <b>38,2</b> | <b>57,0</b>  | <b>86,8</b> | <b>100,7</b> | <b>113,3</b> | <b>114,0</b> | <b>87,8</b> |           |
| 26       | g TOTAL | 26,8        | 53,5        | 80,3         | 133,8       | 187,3        | 240,8        | 321,1        | 401,4       | PI-SVMP   |
|          | g RET   | 26,3        | 48,9        | 55,5 (69.1%) | 42,8        | 37,4         | 34,5         | 24,9         | 14,1        |           |
| <b>Σ</b> |         | <b>26,3</b> | <b>48,9</b> | <b>55,5</b>  | <b>42,8</b> | <b>37,4</b>  | <b>34,5</b>  | <b>24,9</b>  | <b>14,1</b> |           |
| 28       | g TOTAL | 1,8         | 3,5         | 5,3          | 8,8         | 12,3         | 15,8         | 21,1         | 26,3        | PIII-SVMP |
|          | g RET   | 1,8         | 3,5         | 5,3          | 8,8         | 12,3         | 15,8         | 18,2 (86.3%) | 18,2        |           |
| 29       | g TOTAL | 1,6         | 3,2         | 4,8          | 7,9         | 11,1         | 14,3         | 19,0         | 23,8        |           |
|          | g RET   | 1,4         | 3,2         | 4,8          | 7,9         | 11,1         | 14,3         | 17,7 (93.2%) | 16,8        |           |
| <b>Σ</b> |         | <b>3,2</b>  | <b>6,7</b>  | <b>10,1</b>  | <b>16,7</b> | <b>23,4</b>  | <b>30,1</b>  | <b>35,9</b>  | <b>35,0</b> |           |

Maximal binding capacity: 348,1 g venom proteins retained by 8 mg EchiTab-Plus-ICP (= 43,5 mg venom proteins/g IgG)

Maximal binding for each RP-HPLC fraction is highlighted in yellow background. Green background, amount (in g) of toxin family proteins immunoretained in the affinity columns.

**Table S2.** Total and immunoretained (RET) *N. melanoleuca* (Ghana) venom proteins by EchiTAB-Plus-ICP® antivenom affinity column.

|                  |          | <i>Naja melanoleuca</i> (Ghana) total venom proteins g) |            |            |            |            |             |            |                  |
|------------------|----------|---------------------------------------------------------|------------|------------|------------|------------|-------------|------------|------------------|
| RP-HPLC fraction |          | 100                                                     | 200        | 300        | 500        | 700        | 900         | 1200       | Toxin class      |
| 1                | g TOTAL  | 0,3                                                     | 0,7        | 1,0        | 1,7        | 2,3        | 3,0         | 4,0        |                  |
|                  | g RET    | 0,0                                                     | 0,0        | 0,0        | 0,0        | 0,0        | 0,0         | 0,0        |                  |
| 3                | g TOTAL  | 12,6                                                    | 25,3       | 37,9       | 63,2       | 88,5       | 113,8       | 151,8      |                  |
|                  | g RET    | URQ*                                                    | URQ*       | URQ*       | URQ*       | URQ*       | URQ*        | URQ*       |                  |
| 4                | g TOTAL  | 3,3                                                     | 6,7        | 10,0       | 16,6       | 23,3       | 29,9        | 39,9       |                  |
|                  | g RET    | 0,0                                                     | 0,1        | 0,0        | 0,0        | 0,0        | 0,0         | 0,0        |                  |
| 6                | g TOTAL  | 0,6                                                     | 1,2        | 1,9        | 3,1        | 4,3        | 5,6         | 7,4        |                  |
|                  | g RET    | 0,0                                                     | 0,0        | 0,0        | 0,0        | 0,0        | 0,0         | 0,0        |                  |
| 7                | g TOTAL  | 2,4                                                     | 4,8        | 7,2        | 12,0       | 16,8       | 21,6        | 28,8       |                  |
|                  | g RET    | URQ*                                                    | URQ*       | URQ*       | URQ*       | URQ*       | URQ*        | URQ*       |                  |
| 8                | g TOTAL  | 10,8                                                    | 21,6       | 32,3       | 53,9       | 75,4       | 97,0        | 129,3      | 3FTx (8-14 min)  |
|                  | g RET    | URQ*                                                    | URQ*       | URQ*       | URQ*       | URQ*       | URQ*        | URQ*       |                  |
| 9                | g TOTAL  | 6,6                                                     | 13,2       | 19,8       | 33,0       | 46,3       | 59,5        | 79,3       |                  |
|                  | g RET    | URQ*                                                    | URQ*       | URQ*       | URQ*       | URQ*       | URQ*        | URQ*       |                  |
| 10               | g TOTAL  | 0,5                                                     | 1,0        | 1,5        | 2,5        | 3,5        | 4,5         | 6,0        |                  |
|                  | g RET    | NRQ                                                     | NRQ        | NRQ        | NRQ        | NRQ        | NRQ         | NRQ        |                  |
| 11               | g TOTAL  | 1,0                                                     | 2,1        | 3,1        | 5,1        | 7,2        | 9,2         | 12,3       |                  |
|                  | g RET    | URQ*                                                    | URQ*       | URQ*       | URQ*       | URQ*       | URQ*        | URQ*       |                  |
| 12               | g TOTAL  | 1,1                                                     | 2,2        | 3,3        | 5,5        | 7,7        | 9,9         | 13,2       |                  |
|                  | g RET    | URQ*                                                    | URQ*       | URQ*       | URQ*       | URQ*       | URQ*        | URQ*       |                  |
| 13               | g TOTAL  | 0,7                                                     | 1,3        | 2,0        | 3,4        | 4,7        | 6,0         | 8,1        |                  |
|                  | g RET    | URQ*                                                    | URQ*       | URQ*       | URQ*       | URQ*       | URQ*        | URQ*       |                  |
|                  | <b>Σ</b> | <b>0,0</b>                                              | <b>0,0</b> | <b>0,0</b> | <b>0,0</b> | <b>0,0</b> | <b>0,0</b>  | <b>0,0</b> |                  |
| 15               | g TOTAL  | 0,4                                                     | 0,9        | 1,3        | 2,2        | 3,1        | 4,0         | 5,3        |                  |
|                  | g RET    | 0,4                                                     | 0,8        | 1,1        | 1,8        | 2,2        | 2,5 (62,5%) | 2,3        | PLA <sub>2</sub> |
| 16               | g TOTAL  | 10,3                                                    | 20,6       | 30,9       | 51,5       | 72,2       | 92,8        | 123,7      |                  |

|    |          |             |             |              |             |             |              |              |                  |
|----|----------|-------------|-------------|--------------|-------------|-------------|--------------|--------------|------------------|
|    | g RET    | 9,8         | 10,8        | 11,5 (37,2%) | 10,7        | 10,4        | 8,0          | 1,0          |                  |
| 17 | g TOTAL  | 0,2         | 0,4         | 0,6          | 0,9         | 1,3         | 1,7          | 2,2          |                  |
|    | g RET    | 0,2         | 0,3         | 0,4          | 0,5         | 0,7 (53,8%) | 0,5          | 0,6          |                  |
| 18 | g TOTAL  | 2,3         | 4,7         | 7,0          | 11,7        | 16,4        | 21,0         | 28,0         |                  |
|    | g RET    | 2,3         | 4,2         | 5,3          | 5,0         | 5,0         | 5,8 (27,6%)  | 5,5          |                  |
| 20 | g TOTAL  | 4,9         | 9,7         | 14,6         | 24,3        | 34,0        | 43,7         | 58,2         |                  |
|    | g RET    | 4,6         | 6,6         | 7,2 (49,3%)  | 5,8         | 5,7         | 6,1          | 6,1          |                  |
| 21 | g TOTAL  | 4,4         | 8,7         | 13,1         | 21,8        | 30,5        | 39,2         | 52,3         |                  |
|    | g RET    | 3,3         | 4,9         | 7,8          | 4,1         | 11,5        | 20,1         | 24,2 (45,9%) |                  |
|    | <b>Σ</b> | <b>20,9</b> | <b>27,6</b> | <b>33,3</b>  | <b>27,9</b> | <b>35,5</b> | <b>43,0</b>  | <b>41,2</b>  |                  |
| 22 | g TOTAL  | 12,0        | 24,0        | 36,1         | 60,1        | 84,2        | 108,2        | 144,3        |                  |
|    | g RET    | 9,8         | 12,0        | 12,6         | 12,8        | 24 (28,5%)  | 14,3         | 1,2          |                  |
| 23 | g TOTAL  | 1,5         | 3,1         | 4,6          | 7,7         | 10,8        | 13,9         | 18,6         | 3FTx (18-22 min) |
|    | g RET    | 1,5         | 2,2         | 2,8          | 2,5         | 2,8         | 3,7 (26,6%)  | 2,7          |                  |
| 24 | g TOTAL  | 0,2         | 0,4         | 0,6          | 1,1         | 1,5         | 1,9          | 2,6          |                  |
|    | g RET    | URQ*        | URQ*        | URQ*         | URQ*        | URQ*        | URQ*         | URQ*         |                  |
|    | <b>Σ</b> | <b>11,5</b> | <b>14,6</b> | <b>16,0</b>  | <b>16,4</b> | <b>28,3</b> | <b>19,9</b>  | <b>6,2</b>   |                  |
| 27 | g TOTAL  | 0,6         | 1,3         | 1,9          | 3,2         | 4,5         | 5,8          | 7,8          | Vespryn          |
|    | g RET    | -0,2        | 0,4         | 0,4          | 0,4         | 0,2         | 0,8 (13,8%)  | 0,0          |                  |
|    | <b>Σ</b> | <b>-0,2</b> | <b>0,4</b>  | <b>0,4</b>   | <b>0,4</b>  | <b>0,2</b>  | <b>0,8</b>   | <b>0,0</b>   |                  |
| 29 | g TOTAL  | 3,9         | 7,8         | 11,6         | 19,4        | 27,2        | 34,9         | 46,6         |                  |
|    | g RET    | 3,5         | 5,3         | 6,5 (56%)    | 4,8         | 5,1         | 5,3          | 0,3          |                  |
| 30 | g TOTAL  | 0,9         | 1,8         | 2,7          | 4,6         | 6,4         | 8,2          | 11,0         | CRISP            |
|    | g RET    | 0,7         | 0,7         | 0,9 (33,3%)  | 0,5         | 0,9         | 0,7          | 0,8          |                  |
| 32 | g TOTAL  | 4,7         | 9,3         | 14,0         | 23,3        | 32,6        | 41,9         | 55,9         |                  |
|    | g RET    | 3,4         | 5,5         | 7,2          | 8,2         | 10,1        | 10,7 (25,5%) | 5,7          |                  |
|    | <b>Σ</b> | <b>7,6</b>  | <b>11,5</b> | <b>14,6</b>  | <b>13,5</b> | <b>16,1</b> | <b>16,7</b>  | <b>6,8</b>   |                  |
| 34 | g TOTAL  | 1,1         | 2,1         | 3,2          | 5,3         | 7,5         | 9,6          | 12,8         | PIII-SVMP        |
|    | g RET    | 1,1         | 2,1         | 3,2          | 3,6 (67,9%) | 2,8         | 2,4          | 3,1          |                  |
| 35 | g TOTAL  | 6,0         | 12,0        | 18,0         | 30,0        | 42,0        | 54,0         | 72,0         |                  |

|    |          |            |             |             |             |             |              |             |     |
|----|----------|------------|-------------|-------------|-------------|-------------|--------------|-------------|-----|
|    | g RET    | 6,0        | 10,5        | 14,0        | 14,8        | 15,8        | 16,5 (30,6%) | 7,3         |     |
|    | <b>Σ</b> | <b>7,6</b> | <b>13,5</b> | <b>18,6</b> | <b>19,7</b> | <b>19,5</b> | <b>20,2</b>  | <b>12,0</b> |     |
| 36 | g TOTAL  | 0,3        | 0,6         | 0,9         | 1,5         | 2,1         | 2,8          | 2,7         | PDE |
|    | g RET    | 0,3        | 0,6         | 0,9         | 1,5         | 2,1         | 2,8 (100%)   | 2,7         |     |
|    | <b>Σ</b> | <b>0,3</b> | <b>0,6</b>  | <b>0,9</b>  | <b>1,5</b>  | <b>2,1</b>  | <b>2,8</b>   | <b>2,7</b>  |     |
| 37 | g TOTAL  | 1,6        | 3,2         | 4,7         | 7,9         | 11,0        | 14,2         | 18,9        | PDE |
|    | g RET    | 1,2        | 2,7         | 3,5         | 6,7         | 7,9         | 8,7 (61,2%)  | 6,1         |     |
| 38 | g TOTAL  | 0,6        | 1,1         | 1,7         | 2,8         | 3,9         | 5,0          | 6,7         | LAO |
|    | g RET    | 0,6        | 1,1         | 1,5         | 2,4         | 2,8 (72%)   | 2,6          | 2,5         |     |
| 39 | g TOTAL  | 3,6        | 7,3         | 10,9        | 18,2        | 25,5        | 32,8         | 43,8        | LAO |
|    | g RET    | 3,5        | 7,1         | 10,7        | 16,9        | 20,7        | 23,8 (72,5%) | 23,8        |     |
|    | <b>Σ</b> | <b>5,3</b> | <b>10,9</b> | <b>15,7</b> | <b>26,0</b> | <b>31,4</b> | <b>35,1</b>  | <b>32,4</b> |     |

Maximal binding capacity: 156,5 g venom proteins retained by 8 mg EchiTAB-Plus-ICP (= 19,6 mg venom proteins/g IgG)

Maximal binding for each RP-HPLC fraction is highlighted in yellow background. Green background, amount (in g) of toxin family proteins immunoretained in the affinity columns. \* URQ, Unreliable quantification; indistinguishable from non-specific binding background.
